# Supplementary material for: Influence of Human Activities on Broad-Scale Estuarine-Marine Habitats Using Omics-Based Approaches Applied to Marine Sediments
Source: MDPI journal article supplement (doi:10.3390/microorganisms7100419), 2019-10-04
Supplement: s2 [file s2]

## Supplementary Section:

# Influence of human activities on broadscale estuarine-marine habitats using omics-based approaches applied to marine sediments

Rohan M. Shah<sup>1</sup>, Joseph Crosswell<sup>2</sup>, Suzanne S. Metcalfe<sup>3</sup>, Geoffrey Carlin<sup>2</sup>, Paul D. Morrison<sup>4</sup>, Avinash V. Karpe<sup>3</sup>, Enzo A. Palombo<sup>1</sup>, Andy D.L. Steven<sup>2</sup>, and David J. Beale<sup>3\*</sup>

<sup>1</sup> Department of Chemistry and Biotechnology, Faculty of Science, Engineering and Technology, Swinburne University of Technology, P. O. Box 218, Hawthorn, Victoria 3122, Australia; rshah@swin.edu.au ([RMS](mailto:rshah@swin.edu.au)), epalombo@swin.edu.au ([EAP](mailto:epalombo@swin.edu.au)).

<sup>2</sup> Oceans and Atmosphere, Commonwealth Scientific and Industrial Research Organization, P. O. Box 2583, Dutton Park, Queensland 4001, Australia; joey.crosswell@csiro.au (JC); geoffrey.carlin@csiro.au (GC); andy.steven@csiro.au (ADLS).

<sup>3</sup> Land and Water, Commonwealth Scientific and Industrial Research Organization, P. O. Box 2583, Dutton Park, Queensland 4001, Australia; suzanne.metcalfe@csiro.au (SSM); avinash.karpe@csiro.au (AVK); david.beale@csiro.au ([DJB](mailto:david.beale@csiro.au)).

<sup>4</sup> Australian Centre for Research on Separation Science, School of Applied Sciences, RMIT University, Melbourne, VIC 3001, Australia; paul.morrison@rmit.edu.au (PDM).

\* Correspondence: david.beale@csiro.au; Tel.: +61-7-3833-5774

**Table 1.** Percentage of sediment grain particles with a diameter smaller than the sieve size fraction indicated for each site.

| Site | Habitat       | Core depth (cm) | Sediment grain particles (%) |                   |                    |              |
|------|---------------|-----------------|------------------------------|-------------------|--------------------|--------------|
|      |               |                 | 2.36 < x < 4.76 mm           | 0.6 < x < 2.36 mm | 0.075 < x < 0.6 mm | x < 0.075 mm |
|      |               |                 | Gravel                       | Coarse sand       | Fine sand          | Silt         |
| 1    | River         | 10              | 0.0                          | 51.3              | 48.7               | 0.0          |
|      |               | 20              | 0.0                          | 8.4               | 89.3               | 2.3          |
|      |               | 30              | 0.1                          | 6.4               | 91.1               | 2.4          |
|      |               | 40              | 0.7                          | 8.0               | 89.8               | 1.5          |
| 2    | Sandy channel | 10              | 0.0                          | 21.5              | 77.0               | 1.5          |
|      |               | 20              | 1.9                          | 37.3              | 58.9               | 2.0          |
|      |               | 30              | 22.0                         | 46.7              | 27.3               | 3.9          |
|      |               | 40              | 9.3                          | 37.5              | 51.2               | 2.0          |
| 3    | Sandy channel | 10              | 1.4                          | 2.6               | 94.9               | 1.2          |
|      |               | 20              | 0.1                          | 3.6               | 93.8               | 2.6          |
|      |               | 30              | 7.4                          | 11.3              | 75.4               | 5.8          |
| 4    | Bioturbed mud | 10              | 0.0                          | 25.1              | 69.6               | 5.3          |
|      |               | 20              | 0.0                          | 14.2              | 77.5               | 8.3          |
|      |               | 30              | 0.1                          | 1.7               | 94.7               | 3.4          |
|      |               | 40              | 0.0                          | 3.6               | 89.9               | 6.5          |
| 5    | Bioturbed mud | 10              | 2.5                          | 17.4              | 79.3               | 0.8          |
|      |               | 20              | 1.9                          | 13.8              | 82.1               | 2.2          |
|      |               | 30              | 4.8                          | 19.5              | 75.0               | 0.8          |
|      |               | 40              | 4.7                          | 9.3               | 83.9               | 2.1          |
| 6    | Bioturbed mud | 10              | 27.0                         | 34.6              | 33.5               | 4.9          |
|      |               | 20              | 14.5                         | 17.8              | 64.2               | 3.4          |
|      |               | 30              | 13.1                         | 17.4              | 67.8               | 1.7          |
|      |               | 40              | 40.3                         | 27.5              | 31.0               | 1.3          |
| 7    | Bioturbed mud | 10              | 8.8                          | 13.4              | 73.4               | 4.4          |
|      |               | 20              | 21.1                         | 11.0              | 67.0               | 0.9          |
|      |               | 30              | 1.2                          | 4.6               | 89.4               | 4.8          |
| 8    | Seagrass      | 10              | 17.9                         | 47.5              | 34.6               | 0.0          |
|      |               | 20              | 11.4                         | 37.6              | 45.7               | 5.4          |
| 9    | River         | 10              | 1.9                          | 10.4              | 79.2               | 8.5          |
|      |               | 20              | 13.5                         | 31.6              | 51.6               | 3.3          |
|      |               | 30              | 20.0                         | 26.8              | 51.6               | 1.7          |
|      |               | 40              | 0.5                          | 9.1               | 90.3               | 0.0          |

**Table 2.** Total organic content analysis for each site.

| Site | Habitat       | Core depth<br>(cm) | Total organic content (mg g <sup>-1</sup> ) |       |       |      | Fraction Organic<br>Carbon ( <i>f<sub>OC</sub></i> ) |
|------|---------------|--------------------|---------------------------------------------|-------|-------|------|------------------------------------------------------|
|      |               |                    | TC                                          | TOC   | IC    | TN   |                                                      |
| 1    | River         | 10                 | 21.48                                       | 21.48 | 0.00  | 1.57 | 0.00215                                              |
|      |               | 20                 | 26.24                                       | 26.24 | 0.00  | 1.95 | 0.00262                                              |
|      |               | 30                 | 4.53                                        | 4.53  | 0.00  | 0.25 | 0.00045                                              |
|      |               | 40                 | 11.81                                       | 11.81 | 0.00  | 0.60 | 0.00118                                              |
| 2    | Sandy Channel | 10                 | 8.35                                        | 8.35  | 0.00  | 0.60 | 0.00083                                              |
|      |               | 20                 | 9.22                                        | 9.22  | 0.00  | 0.54 | 0.00092                                              |
|      |               | 30                 | 15.52                                       | 15.52 | 0.00  | 0.88 | 0.00155                                              |
|      |               | 40                 | 13.92                                       | 13.92 | 0.00  | 0.86 | 0.00139                                              |
| 3    | Sandy Channel | 10                 | 4.65                                        | 4.29  | 0.72  | 0.30 | 0.00043                                              |
|      |               | 20                 | 3.84                                        | 3.04  | 0.82  | 0.17 | 0.00030                                              |
|      |               | 30                 | 10.47                                       | 8.59  | 2.13  | 0.66 | 0.00086                                              |
| 4    | Bioturbed mud | 10                 | 19.16                                       | 11.00 | 8.56  | 1.17 | 0.00110                                              |
|      |               | 20                 | 17.66                                       | 9.65  | 8.33  | 0.99 | 0.00097                                              |
|      |               | 30                 | 15.09                                       | 6.82  | 8.41  | 0.58 | 0.00068                                              |
|      |               | 40                 | 14.52                                       | 5.82  | 8.78  | 0.48 | 0.00058                                              |
| 5    | Bioturbed mud | 10                 | 22.78                                       | 7.27  | 15.77 | 1.14 | 0.00073                                              |
|      |               | 20                 | 23.44                                       | 6.57  | 17.00 | 1.01 | 0.00066                                              |
|      |               | 30                 | 23.55                                       | 6.17  | 17.55 | 0.83 | 0.00062                                              |
|      |               | 40                 | 22.66                                       | 4.92  | 17.85 | 0.82 | 0.00049                                              |
| 6    | Bioturbed mud | 10                 | 16.75                                       | 9.44  | 7.53  | 0.95 | 0.00094                                              |
|      |               | 20                 | 19.41                                       | 6.87  | 12.64 | 0.99 | 0.00069                                              |
|      |               | 30                 | 18.86                                       | 5.17  | 13.81 | 0.78 | 0.00052                                              |
|      |               | 40                 | 8.65                                        | 6.78  | 1.90  | 0.78 | 0.00068                                              |
| 7    | Bioturbed mud | 10                 | 10.67                                       | 8.73  | 2.15  | 0.87 | 0.00087                                              |
|      |               | 20                 | 8.17                                        | 6.16  | 1.96  | 0.87 | 0.00062                                              |
|      |               | 30                 | 10.75                                       | 9.16  | 1.59  | 0.93 | 0.00092                                              |
| 8    | Seagrass      | 10                 | 62.19                                       | 7.55  | 55.09 | 1.24 | 0.00076                                              |
|      |               | 20                 | 15.63                                       | 10.70 | 5.11  | 1.15 | 0.00107                                              |
| 9    | River         | 10                 | 8.94                                        | 7.57  | 1.59  | 1.11 | 0.00076                                              |
|      |               | 20                 | 12.22                                       | 9.71  | 2.73  | 1.20 | 0.00097                                              |
|      |               | 30                 | 9.34                                        | 7.48  | 1.92  | 0.97 | 0.00075                                              |
|      |               | 40                 | 2.54                                        | 2.07  | 0.40  | 0.60 | 0.00021                                              |

TC – Total carbon; TOC – Total organics carbon; IC – Inorganic carbon; TN – Total nitrogen.

**Table 3.** Metals analyzed by ICP-MS in sampled marine sediments collected from Moreton bay.

|      |               |                    | Antimony<br>(Sb)                               | Cadmium<br>(Cd) | Chromium<br>(Cr) | Copper<br>(Cu) | Lead (Pb)   | Nickel (Ni) | Silver (Ag)  | Zinc (Zn)   |     |
|------|---------------|--------------------|------------------------------------------------|-----------------|------------------|----------------|-------------|-------------|--------------|-------------|-----|
|      |               |                    | ISQG-High (trigger value) *                    | 25              | 10               | 370            | 270         | 220         | 52           | 3.7         | 410 |
|      |               |                    | ISQG-Low (trigger value) *                     | 2               | 1.5              | 80             | 65          | 50          | 21           | 1           | 200 |
| Site | Habitat       | Core depth<br>(cm) | Concentration (mg kg <sup>-1</sup> dry weight) |                 |                  |                |             |             |              |             |     |
| 1    | River         | 10                 | < 0.2 (N.D.)                                   | < 0.1<br>(N.D.) | 1.9 ± < 0.1      | 1.8 ± < 0.1    | 0.7 ± 0.2   | 1.3 ± < 0.1 | < 0.1 (N.D.) | 4.3 ± < 0.1 |     |
|      |               | 20                 | < 0.2 (N.D.)                                   | < 0.1<br>(N.D.) | 0.6 ± < 0.1      | 0.5 ± < 0.1    | 0.2 ± < 0.1 | 0.4 ± < 0.1 | < 0.1 (N.D.) | 1.4 ± 0.4   |     |
|      |               | 30                 | < 0.2 (N.D.)                                   | < 0.1<br>(N.D.) | 0.7 ± < 0.1      | 0.7 ± < 0.1    | 0.3 ± < 0.1 | 0.5 ± < 0.1 | < 0.1 (N.D.) | 1.8 ± 0.2   |     |
|      |               | 40                 | < 0.2 (N.D.)                                   | < 0.1<br>(N.D.) | 1.8 ± < 0.1      | 1.8 ± < 0.1    | 0.5 ± < 0.1 | 1.0 ± < 0.1 | < 0.1 (N.D.) | 3.6 ± 0.2   |     |
| 2    | Sandy Channel | 10                 | < 0.2 (N.D.)                                   | < 0.1<br>(N.D.) | 1.4 ± < 0.1      | 1.2 ± < 0.1    | 0.6 ± < 0.1 | 0.9 ± < 0.1 | < 0.1 (N.D.) | 3.4 ± 0.2   |     |
|      |               | 20                 | < 0.2 (N.D.)                                   | < 0.1<br>(N.D.) | 1.2 ± < 0.1      | 1.1 ± < 0.1    | 0.5 ± < 0.1 | 0.9 ± < 0.1 | < 0.1 (N.D.) | 2.7 ± 0.4   |     |
|      |               | 30                 | < 0.2 (N.D.)                                   | < 0.1<br>(N.D.) | 1.7 ± < 0.1      | 1.3 ± < 0.1    | 0.6 ± < 0.1 | 1.5 ± 0.1   | < 0.1 (N.D.) | 3.8 ± 0.5   |     |
|      |               | 40                 | < 0.2 (N.D.)                                   | < 0.1<br>(N.D.) | 0.8 ± < 0.1      | 0.8 ± < 0.1    | 0.2 ± < 0.1 | 0.7 ± < 0.1 | < 0.1 (N.D.) | 1.9 ± 0.6   |     |
| 3    | Sandy Channel | 10                 | < 0.2 (N.D.)                                   | < 0.1<br>(N.D.) | 0.4 ± < 0.1      | 0.2 ± < 0.1    | 0.1 ± < 0.1 | 0.1 ± < 0.1 | < 0.1 (N.D.) | 0.4 ± 0.3   |     |
|      |               | 20                 | < 0.2 (N.D.)                                   | < 0.1<br>(N.D.) | 0.5 ± < 0.1      | 0.2 ± < 0.1    | 0.1 ± < 0.1 | 0.2 ± < 0.1 | < 0.1 (N.D.) | 0.5 ± 0.4   |     |
|      |               | 30                 | < 0.2 (N.D.)                                   | < 0.1<br>(N.D.) | 1.7 ± < 0.1      | 1.4 ± < 0.1    | 0.4 ± < 0.1 | 0.7 ± < 0.1 | < 0.1 (N.D.) | 2.0 ± 0.9   |     |

**Table 3.** Metals analyzed by ICP-MS in sampled marine sediments collected from Moreton bay (*continued*).

|                             |               |                    | Antimony<br>(Sb)                               | Cadmium<br>(Cd) | Chromium<br>(Cr) | Copper<br>(Cu) | Lead (Pb)   | Nickel (Ni) | Silver (Ag)  | Zinc (Zn) |
|-----------------------------|---------------|--------------------|------------------------------------------------|-----------------|------------------|----------------|-------------|-------------|--------------|-----------|
| ISQG-High (trigger value) * |               |                    | 25                                             | 10              | 370              | 270            | 220         | 52          | 3.7          | 410       |
| ISQG-Low (trigger value) *  |               |                    | 2                                              | 1.5             | 80               | 65             | 50          | 21          | 1            | 200       |
| Site                        | Habitat       | Core depth<br>(cm) | Concentration (mg kg <sup>-1</sup> dry weight) |                 |                  |                |             |             |              |           |
| 4                           | Bioturbed mud | 10                 | < 0.2 (N.D.)                                   | < 0.1<br>(N.D.) | 2.2 ± < 0.1      | 0.9 ± < 0.1    | 0.7 ± < 0.1 | 1.1 ± < 0.1 | < 0.1 (N.D.) | 3.2 ± 0.2 |
|                             |               | 20                 | < 0.2 (N.D.)                                   | < 0.1<br>(N.D.) | 2.2 ± < 0.1      | 1.7 ± < 0.1    | 0.7 ± < 0.1 | 1.1 ± < 0.1 | < 0.1 (N.D.) | 3.2 ± 0.6 |
|                             |               | 30                 | < 0.2 (N.D.)                                   | < 0.1<br>(N.D.) | 1.6 ± < 0.1      | 1.1 ± < 0.1    | 0.3 ± < 0.1 | 0.8 ± < 0.1 | < 0.1 (N.D.) | 2.1 ± 0.7 |
|                             |               | 40                 | < 0.2 (N.D.)                                   | < 0.1<br>(N.D.) | 1.6 ± < 0.1      | 1.1 ± < 0.1    | 0.4 ± 0.1   | 0.8 ± < 0.1 | < 0.1 (N.D.) | 1.9 ± 1.0 |
| 5                           | Bioturbed mud | 10                 | < 0.2 (N.D.)                                   | < 0.1<br>(N.D.) | 1.9 ± < 0.1      | 0.9 ± < 0.1    | 0.6 ± 0.2   | 0.8 ± 0.1   | < 0.1 (N.D.) | 2.5 ± 0.9 |
|                             |               | 20                 | < 0.2 (N.D.)                                   | < 0.1<br>(N.D.) | 1.8 ± < 0.1      | 0.8 ± < 0.1    | 0.6 ± < 0.1 | 0.8 ± < 0.1 | < 0.1 (N.D.) | 2.3 ± 0.3 |
|                             |               | 30                 | < 0.2 (N.D.)                                   | < 0.1<br>(N.D.) | 1.6 ± < 0.1      | 0.4 ± < 0.1    | 0.5 ± 0.2   | 0.7 ± < 0.1 | < 0.1 (N.D.) | 2.0 ± 0.9 |
|                             |               | 40                 | < 0.2 (N.D.)                                   | < 0.1<br>(N.D.) | 1.8 ± < 0.1      | 0.5 ± < 0.1    | 0.5 ± < 0.1 | 0.9 ± < 0.1 | < 0.1 (N.D.) | 2.2 ± 0.2 |

\*Trigger values taken from the Australian and New Zealand Guidelines for Fresh and Marine Water Quality Management Strategy [26]; N.D. – Not detected

**Table 3.** Metals analyzed by ICP-MS in sampled marine sediments collected from Moreton bay (*continued*).

|      |               |                    | Antimony<br>(Sb)                               | Cadmium<br>(Cd) | Chromium<br>(Cr) | Copper<br>(Cu) | Lead<br>(Pb) | Nickel<br>(Ni) | Silver<br>(Ag) | Zinc<br>(Zn) |
|------|---------------|--------------------|------------------------------------------------|-----------------|------------------|----------------|--------------|----------------|----------------|--------------|
|      |               |                    | 25                                             | 10              | 370              | 270            | 220          | 52             | 3.7            | 410          |
|      |               |                    | 2                                              | 1.5             | 80               | 65             | 50           | 21             | 1              | 200          |
| Site | Habitat       | Core depth<br>(cm) | Concentration (mg kg <sup>-1</sup> dry weight) |                 |                  |                |              |                |                |              |
| 6    | Bioturbed mud | 10                 | < 0.2 (N.D.)                                   | < 0.1<br>(N.D.) | 2.6 ± < 0.1      | 4.1 ± < 0.1    | 1.3 ± < 0.1  | 1.3 ± < 0.1    | < 0.1 (N.D.)   | 5.4 ± 0.6    |
|      |               | 20                 | < 0.2 (N.D.)                                   | < 0.1<br>(N.D.) | 2.1 ± < 0.1      | 1.9 ± < 0.1    | 0.5 ± < 0.1  | 1.2 ± < 0.1    | < 0.1 (N.D.)   | 3.3 ± 0.3    |
|      |               | 30                 | < 0.2 (N.D.)                                   | < 0.1<br>(N.D.) | 1.9 ± < 0.1      | 0.9 ± < 0.1    | 0.4 ± < 0.1  | 1.1 ± < 0.1    | < 0.1 (N.D.)   | 2.8 ± 0.2    |
|      |               | 40                 | < 0.2 (N.D.)                                   | < 0.1<br>(N.D.) | 2.0 ± < 0.1      | 2.5 ± < 0.1    | 0.6 ± < 0.1  | 1.1 ± < 0.1    | < 0.1 (N.D.)   | 2.9 ± 0.7    |
| 7    | Bioturbed mud | 10                 | < 0.2 (N.D.)                                   | < 0.1<br>(N.D.) | 1.7 ± < 0.1      | 1.8 ± < 0.1    | 0.5 ± < 0.1  | 0.7 ± < 0.1    | < 0.1 (N.D.)   | 1.7 ± 0.7    |
|      |               | 20                 | < 0.2 (N.D.)                                   | < 0.1<br>(N.D.) | 1.3 ± < 0.1      | 0.9 ± < 0.1    | 0.4 ± < 0.1  | 0.5 ± 0.1      | < 0.1 (N.D.)   | 1.2 ± 0.3    |
|      |               | 30                 | < 0.2 (N.D.)                                   | < 0.1<br>(N.D.) | 1.6 ± < 0.1      | 1.6 ± < 0.1    | 0.5 ± < 0.1  | 0.6 ± < 0.1    | < 0.1 (N.D.)   | 1.3 ± 0.1    |
| 8    | Seagrass      | 10                 | < 0.2 (N.D.)                                   | < 0.1<br>(N.D.) | 1.7 ± < 0.1      | 1.2 ± < 0.1    | 0.6 ± < 0.1  | 0.8 ± < 0.1    | < 0.1 (N.D.)   | 2.9 ± 0.8    |
|      |               | 20                 | < 0.2 (N.D.)                                   | < 0.1<br>(N.D.) | 1.8 ± < 0.1      | 2.0 ± < 0.1    | 0.6 ± < 0.1  | 0.7 ± < 0.1    | < 0.1 (N.D.)   | 1.8 ± 0.8    |

\*Trigger values taken from the Australian and New Zealand Guidelines for Fresh and Marine Water Quality Management Strategy [26]; N.D. – Not detected

**Table 3.** Metals analyzed by ICP-MS in sampled marine sediments collected from Moreton bay (*continued*).

|                             |         | Antimony<br>(Sb)   | Cadmium<br>(Cd)                                | Chromium<br>(Cr) | Copper<br>(Cu) | Lead<br>(Pb) | Nickel<br>(Ni) | Silver<br>(Ag) | Zinc<br>(Zn)           |
|-----------------------------|---------|--------------------|------------------------------------------------|------------------|----------------|--------------|----------------|----------------|------------------------|
| ISQG-High (trigger value) * |         | 25                 | 10                                             | 370              | 270            | 220          | 52             | 3.7            | 410                    |
| ISQG-Low (trigger value) *  |         | 2                  | 1.5                                            | 80               | 65             | 50           | 21             | 1              | 200                    |
| Site                        | Habitat | Core depth<br>(cm) | Concentration (mg kg <sup>-1</sup> dry weight) |                  |                |              |                |                |                        |
| 9                           | River   | 10                 | < 0.2 (N.D.)                                   | < 0.1<br>(N.D.)  | 2.1 ± < 0.1    | 3.3 ± < 0.1  | 1.2 ± < 0.1    | 1.3 ± < 0.1    | < 0.1 (N.D.) 6.2 ± 0.6 |
|                             |         | 20                 | < 0.2 (N.D.)                                   | < 0.1<br>(N.D.)  | 2.6 ± < 0.1    | 2.3 ± < 0.1  | 4.3 ± < 0.1    | 1.1 ± < 0.1    | < 0.1 (N.D.) 6.1 ± 0.6 |
|                             |         | 30                 | < 0.2 (N.D.)                                   | < 0.1<br>(N.D.)  | 1.1 ± < 0.1    | 1.0 ± < 0.1  | 1.4 ± < 0.1    | 0.8 ± < 0.1    | < 0.1 (N.D.) 4.5 ± 0.9 |
|                             |         | 40                 | < 0.2 (N.D.)                                   | < 0.1<br>(N.D.)  | 0.7 ± < 0.1    | 0.3 ± < 0.1  | 0.4 ± < 0.1    | 0.6 ± 0.1      | 1.8 ± 0.3 1.4 ± 1.0    |

\*Trigger values taken from the Australian and New Zealand Guidelines for Fresh and Marine Water Quality Management Strategy [26]; N.D. – Not detected

**Table 4.** Organic contaminants screened in sampled marine sediments collected from Moreton bay.

| Class            | Compound                    | Abbreviation | PubChem<br>CID | Retention<br>Time (min) | Library<br>match<br>(%) |
|------------------|-----------------------------|--------------|----------------|-------------------------|-------------------------|
| Antibiotic       | Clarithromycin              | CLA          | 84029          | 6.065                   | 94.32                   |
|                  | Penicillin V                | PEN          | 6869           | 0.98                    | 81.51                   |
|                  | Trimethoprim                | TRI          | 5578           | 6.633                   | 87.41                   |
| Antidepressant   | Fluoxetine                  | FLX          | 3386           | 6.096                   | 92.52                   |
| Antihistamine    | Diphenhydramine             | DPHM         | 3100           | 5.855                   | 93.82                   |
|                  | Promethazine                | PROM         | 4927           | 5.956                   | 96.77                   |
| Antiseizure      | Carbamazepine               | CARB         | 2554           | 5.732                   | 95.74                   |
| Pesticide        | N, N-Diethyl-meta-toluamide | DEET         | 4284           | 6.547                   | 98.27                   |
|                  | S-methoprene                | SMP          | 1711973        | 8.614                   | 95.07                   |
| Stimulant        | Caffeine                    | CAF          | 2519           | 8.414                   | 98.18                   |
| $\beta$ -blocker | DL-Atenolol                 | ATN          | 2249           | 6.003                   | 86.12                   |
|                  | Pindolol                    | PIN          | 4828           | 0.879                   | 86.01                   |
|                  | Propranolol                 | PRP          | 4946           | 1.237                   | 80.74                   |

1

**Table 5.** Organic pollutants observed in sampled marine sediments collected from Moreton bay.

| Site | Habitat       | Core depth (cm) | Pesticides and Personal Care Products (PPCPs), $\mu\text{g g}^{-1}$ TOC dry sediment |      |      |      |      |       |       |      |      |      |       |      |      |
|------|---------------|-----------------|--------------------------------------------------------------------------------------|------|------|------|------|-------|-------|------|------|------|-------|------|------|
|      |               |                 | CLA                                                                                  | PEN  | TRI  | FLX  | DPHM | PROM  | CARB  | DEET | SMP  | CAF  | ATN   | PIN  | PRP  |
| 1    | River         | 10              | N.D.                                                                                 | N.D. | N.D. | N.D. | N.D. | N.D.  | N.D.  | 33.9 | N.D. | N.D. | N.D.  | N.D. | N.D. |
|      |               | 20              | N.D.                                                                                 | N.D. | N.D. | N.D. | N.D. | N.D.  | N.D.  | N.D. | N.D. | N.D. | N.D.  | N.D. | N.D. |
|      |               | 30              | 65.4                                                                                 | 81.0 | N.D. | 41.1 | N.D. | N.D.  | 67.6  | 53.2 | N.D. | N.D. | 130.3 | N.D. | N.D. |
|      |               | 40              | N.D.                                                                                 | N.D. | N.D. | N.D. | N.D. | N.D.  | N.D.  | N.D. | N.D. | N.D. | 47.5  | N.D. | N.D. |
| 2    | Sandy Channel | 10              | 38.9                                                                                 | 30.8 | N.D. | N.D. | N.D. | 45.1  | N.D.  | 32.4 | N.D. | N.D. | 75.2  | N.D. | N.D. |
|      |               | 20              | 35.1                                                                                 | N.D. | N.D. | N.D. | N.D. | N.D.  | N.D.  | 31.6 | N.D. | N.D. | 53.8  | N.D. | N.D. |
|      |               | 30              | N.D.                                                                                 | N.D. | N.D. | N.D. | N.D. | N.D.  | N.D.  | N.D. | N.D. | N.D. | N.D.  | N.D. | N.D. |
|      |               | 40              | N.D.                                                                                 | N.D. | N.D. | N.D. | N.D. | 38.2  | N.D.  | N.D. | N.D. | N.D. | N.D.  | N.D. | N.D. |
| 3    | Sandy Channel | 10              | 58.4                                                                                 | 80.6 | 43.2 | 37.6 | N.D. | 147.8 | N.D.  | 52.1 | N.D. | N.D. | N.D.  | N.D. | N.D. |
|      |               | 20              | N.D.                                                                                 | 69.8 | N.D. | 54.7 | 81.1 | 198.0 | 102.7 | 84.4 | N.D. | N.D. | 201.9 | N.D. | N.D. |
|      |               | 30              | 32.2                                                                                 | N.D. | N.D. | N.D. | N.D. | 85.8  | N.D.  | N.D. | N.D. | N.D. | N.D.  | N.D. | N.D. |
| 4    | Bioturbed mud | 10              | N.D.                                                                                 | N.D. | N.D. | N.D. | N.D. | 54.2  | N.D.  | N.D. | N.D. | N.D. | N.D.  | N.D. | 49.9 |
|      |               | 20              | 36.5                                                                                 | 31.0 | N.D. | N.D. | N.D. | N.D.  | N.D.  | N.D. | N.D. | N.D. | 60.6  | N.D. | N.D. |
|      |               | 30              | 40.0                                                                                 | N.D. | 30.0 | 34.4 | 40.5 | 101.8 | N.D.  | N.D. | N.D. | N.D. | 92.0  | N.D. | N.D. |
|      |               | 40              | N.D.                                                                                 | N.D. | 34.0 | 35.7 | 44.9 | 100.4 | N.D.  | N.D. | N.D. | N.D. | 92.1  | N.D. | N.D. |
| 5    | Bioturbed mud | 10              | 32.7                                                                                 | 34.0 | N.D. | N.D. | N.D. | N.D.  | N.D.  | N.D. | N.D. | N.D. | 74.0  | N.D. | N.D. |
|      |               | 20              | 50.3                                                                                 | N.D. | N.D. | 43.0 | N.D. | N.D.  | 46.8  | N.D. | N.D. | N.D. | 95.6  | N.D. | 59.4 |
|      |               | 30              | N.D.                                                                                 | 44.4 | 35.7 | N.D. | 37.6 | 91.4  | N.D.  | 89.7 | N.D. | N.D. | 68.4  | N.D. | 67.4 |
|      |               | 40              | N.D.                                                                                 | 44.6 | 42.3 | 61.6 | N.D. | N.D.  | N.D.  | N.D. | N.D. | N.D. | 149.7 | N.D. | N.D. |
| 6    | Bioturbed mud | 10              | N.D.                                                                                 | N.D. | N.D. | N.D. | N.D. | 72.1  | N.D.  | N.D. | N.D. | N.D. | 50.0  | N.D. | N.D. |
|      |               | 20              | N.D.                                                                                 | N.D. | N.D. | N.D. | N.D. | N.D.  | N.D.  | N.D. | N.D. | N.D. | 38.6  | N.D. | N.D. |
|      |               | 30              | 71.4                                                                                 | 52.5 | 41.8 | N.D. | N.D. | 130.9 | N.D.  | 44.5 | N.D. | N.D. | 101.6 | N.D. | N.D. |
|      |               | 40              | 53.2                                                                                 | 38.9 | 30.6 | N.D. | N.D. | 69.9  | N.D.  | 91.2 | N.D. | 31.2 | 56.8  | N.D. | N.D. |

N.D. – Not detected.

2

3

4

5

6

**Table 5.** Organic pollutants observed in sampled marine sediments collected from Moreton bay (*continued*).

|   |               |    |      |       |      |      |      |       |       |      |      |      |      |      |      |
|---|---------------|----|------|-------|------|------|------|-------|-------|------|------|------|------|------|------|
| 7 | Bioturbed mud | 10 | N.D. | N.D.  | N.D. | N.D. | N.D. | N.D.  | N.D.  | 74.5 | N.D. | N.D. | 75.3 | N.D. | N.D. |
|   |               | 20 | N.D. | 40.3  | N.D. | N.D. | N.D. | N.D.  | N.D.  | 41.7 | N.D. | N.D. | 53.5 | N.D. | N.D. |
|   |               | 30 | N.D. | 30.0  | N.D. | N.D. | N.D. | N.D.  | N.D.  | 62.5 | N.D. | N.D. | 36.0 | N.D. | 39.8 |
| 8 | Seagrass      | 10 | N.D. | N.D.  | N.D. | N.D. | N.D. | N.D.  | 42.0  | 30.2 | N.D. | 30.0 | 71.8 | N.D. | 42.7 |
|   |               | 20 | 32.8 | 31.6  | N.D. | N.D. | N.D. | N.D.  | 30.4  | N.D. | N.D. | N.D. | 32.8 | N.D. | 42.3 |
| 9 | River         | 10 | 40.7 | 37.0  | N.D. | N.D. | 30.0 | N.D.  | N.D.  | 30.8 | N.D. | N.D. | 69.8 | N.D. | N.D. |
|   |               | 20 | 29.9 | N.D.  | N.D. | N.D. | N.D. | 59.9  | N.D.  | N.D. | N.D. | N.D. | 54.5 | N.D. | 55.7 |
|   |               | 30 | N.D. | N.D.  | N.D. | N.D. | N.D. | N.D.  | 34.7  | N.D. | N.D. | N.D. | 51.3 | N.D. | 31.9 |
|   |               | 40 | N.D. | 147.3 | N.D. | N.D. | 31.5 | 378.2 | 143.5 | N.D. | 46.2 | N.D. | N.D. | N.D. | N.D. |

N.D. – Not detected.

7

8

9

**Table 6.** Unidentified significant metabolites from sampled marine habitat sediments from Moreton bay.

| Metabolite   | F value | P value  | FDR      | Fisher's LSD                                                                |
|--------------|---------|----------|----------|-----------------------------------------------------------------------------|
| Compound 31  | 35.906  | 4.27E-12 | 1.31E-09 | Sandy channel > Bioturbed mud; Sandy channel > River                        |
| Compound 32  | 29.921  | 1.29E-10 | 8.37E-09 | Sandy channel > Bioturbed mud; Sandy channel > River                        |
| Compound 129 | 29.577  | 1.58E-10 | 8.55E-09 | Bioturbed mud > River; Bioturbed mud > Sandy channel                        |
| Compound 38  | 28.595  | 2.85E-10 | 1.32E-08 | Sandy channel > Bioturbed mud; Sandy channel > River                        |
| Compound 274 | 27.235  | 6.53E-10 | 2.12E-08 | River > Bioturbed mud; Sandy channel > Bioturbed mud; Sandy channel > River |
| Compound 296 | 27.235  | 6.53E-10 | 2.12E-08 | River > Bioturbed mud; Sandy channel > Bioturbed mud; Sandy channel > River |
| Compound 99  | 26.356  | 1.13E-09 | 3.32E-08 | River > Bioturbed mud; River > Sandy channel                                |
| Compound 44  | 25.644  | 1.76E-09 | 4.75E-08 | River > Bioturbed mud; Sandy channel > Bioturbed mud; Sandy channel > River |
| Compound 144 | 25.032  | 2.59E-09 | 6.45E-08 | Bioturbed mud > River; Bioturbed mud > Sandy channel                        |
| Compound 51  | 24.181  | 4.46E-09 | 1.03E-07 | Bioturbed mud > River; Bioturbed mud > Sandy channel                        |
| Compound 27  | 23.225  | 8.27E-09 | 1.79E-07 | River > Bioturbed mud; Sandy channel > Bioturbed mud; Sandy channel > River |
| Compound 297 | 22.717  | 1.15E-08 | 2.34E-07 | River > Bioturbed mud; Sandy channel > Bioturbed mud                        |
| Compound 68  | 22.237  | 1.58E-08 | 2.80E-07 | River > Bioturbed mud; Sandy channel > Bioturbed mud                        |
| Compound 62  | 22.237  | 1.58E-08 | 2.80E-07 | River > Bioturbed mud; Sandy channel > Bioturbed mud                        |
| Compound 148 | 22.18   | 1.64E-08 | 2.80E-07 | Bioturbed mud > River; Bioturbed mud > Sandy channel                        |
| Compound 222 | 21.794  | 2.13E-08 | 3.44E-07 | River > Bioturbed mud; Sandy channel > Bioturbed mud                        |
| Compound 29  | 21.104  | 3.37E-08 | 4.97E-07 | River > Bioturbed mud; Sandy channel > Bioturbed mud; Sandy channel > River |
| Compound 248 | 20.291  | 5.85E-08 | 7.58E-07 | River > Bioturbed mud; Sandy channel > Bioturbed mud; Sandy channel > River |
| Compound 79  | 19.576  | 9.56E-08 | 1.19E-06 | Bioturbed mud > River; Bioturbed mud > Sandy channel                        |
| Compound 42  | 19.139  | 1.29E-07 | 1.55E-06 | River > Bioturbed mud; Sandy channel > Bioturbed mud; Sandy channel > River |
| Compound 77  | 18.983  | 1.44E-07 | 1.67E-06 | Bioturbed mud > Sandy channel; River > Sandy channel                        |
| Compound 109 | 17.916  | 3.05E-07 | 3.41E-06 | River > Bioturbed mud; Sandy channel > Bioturbed mud                        |
| Compound 281 | 17.78   | 3.36E-07 | 3.62E-06 | River > Bioturbed mud; Sandy channel > Bioturbed mud                        |
| Compound 102 | 17.626  | 3.75E-07 | 3.92E-06 | Bioturbed mud > River; Bioturbed mud > Sandy channel                        |
| Compound 130 | 16.621  | 7.70E-07 | 7.34E-06 | River > Bioturbed mud; River > Sandy channel                                |
| Compound 138 | 15.684  | 1.53E-06 | 1.41E-05 | Bioturbed mud > River; Bioturbed mud > Sandy channel                        |
| Compound 251 | 15.037  | 2.46E-06 | 2.15E-05 | Sandy channel > Bioturbed mud; Sandy channel > River                        |
| Compound 263 | 14.918  | 2.69E-06 | 2.20E-05 | River > Bioturbed mud; River > Sandy channel                                |

**Table 6.** Unidentified significant metabolites from sampled marine habitat sediments from Moreton bay (*continued*).

| Metabolite   |        | F value  | P value  | FDR | Fisher's LSD                                                                |
|--------------|--------|----------|----------|-----|-----------------------------------------------------------------------------|
| Compound 286 | 14.882 | 2.76E-06 | 2.20E-05 |     | River > Bioturbed mud; River > Sandy channel                                |
| Compound 175 | 14.873 | 2.78E-06 | 2.20E-05 |     | River > Bioturbed mud; River > Sandy channel                                |
| Compound 258 | 14.596 | 3.42E-06 | 2.64E-05 |     | Sandy channel > Bioturbed mud; Sandy channel > River                        |
| Compound 21  | 14.301 | 4.27E-06 | 3.14E-05 |     | Sandy channel > Bioturbed mud; Sandy channel > River                        |
| Compound 170 | 14.142 | 4.81E-06 | 3.39E-05 |     | River > Bioturbed mud; River > Sandy channel                                |
| Compound 30  | 13.315 | 9.02E-06 | 6.09E-05 |     | River > Bioturbed mud; Sandy channel > Bioturbed mud                        |
| Compound 97  | 13.144 | 1.03E-05 | 6.80E-05 |     | River > Bioturbed mud; Sandy channel > Bioturbed mud                        |
| Compound 103 | 13.091 | 1.07E-05 | 6.94E-05 |     | Bioturbed mud > River; Bioturbed mud > Sandy channel; River > Sandy channel |
| Compound 216 | 12.955 | 1.19E-05 | 7.55E-05 |     | Bioturbed mud > River; Bioturbed mud > Sandy channel                        |
| Compound 12  | 12.92  | 1.22E-05 | 7.61E-05 |     | Sandy channel > Bioturbed mud; Sandy channel > River                        |
| Compound 260 | 12.874 | 1.27E-05 | 7.74E-05 |     | River > Bioturbed mud; Sandy channel > Bioturbed mud                        |
| Compound 196 | 12.85  | 1.29E-05 | 7.74E-05 |     | River > Bioturbed mud; River > Sandy channel                                |
| Compound 3   | 12.781 | 1.36E-05 | 7.87E-05 |     | River > Bioturbed mud; River > Sandy channel                                |
| Compound 151 | 12.716 | 1.43E-05 | 8.13E-05 |     | Bioturbed mud > River; Bioturbed mud > Sandy channel; River > Sandy channel |
| Compound 163 | 12.666 | 1.49E-05 | 8.30E-05 |     | River > Bioturbed mud; River > Sandy channel                                |
| Compound 150 | 12.543 | 1.64E-05 | 8.98E-05 |     | Bioturbed mud > River; Bioturbed mud > Sandy channel                        |
| Compound 149 | 12.445 | 1.77E-05 | 9.53E-05 |     | Bioturbed mud > River; Bioturbed mud > Sandy channel                        |
| Compound 110 | 12.188 | 2.16E-05 | 0.000113 |     | River > Bioturbed mud; Sandy channel > Bioturbed mud                        |
| Compound 142 | 12.142 | 2.24E-05 | 0.000115 |     | Bioturbed mud > River; Bioturbed mud > Sandy channel                        |
| Compound 147 | 12.013 | 2.47E-05 | 0.000125 |     | Bioturbed mud > River; Bioturbed mud > Sandy channel                        |
| Compound 262 | 11.918 | 2.66E-05 | 0.000131 |     | River > Bioturbed mud; River > Sandy channel                                |
| Compound 288 | 11.745 | 3.05E-05 | 0.000148 |     | Sandy channel > Bioturbed mud; Sandy channel > River                        |
| Compound 90  | 11.338 | 4.21E-05 | 0.000195 |     | Bioturbed mud > Sandy channel; River > Sandy channel                        |
| Compound 264 | 11.31  | 4.30E-05 | 0.000196 |     | River > Bioturbed mud; River > Sandy channel                                |
| Compound 26  | 11.297 | 4.35E-05 | 0.000196 |     | Bioturbed mud > Sandy channel; River > Sandy channel                        |
| Compound 197 | 10.988 | 5.56E-05 | 0.000244 |     | River > Bioturbed mud; River > Sandy channel                                |
| Compound 132 | 10.874 | 6.09E-05 | 0.000263 |     | Bioturbed mud > River; Bioturbed mud > Sandy channel                        |
| Compound 213 | 10.82  | 6.36E-05 | 0.000271 |     | River > Bioturbed mud; Sandy channel > Bioturbed mud                        |

**Table 6.** Unidentified significant metabolites from sampled marine habitat sediments from Moreton bay (*continued*).

| Metabolite   |        | F value  |          | P value                                                                     | FDR | Fisher's LSD |
|--------------|--------|----------|----------|-----------------------------------------------------------------------------|-----|--------------|
| Compound 91  | 10.614 | 7.50E-05 | 0.000316 | River > Bioturbed mud; Sandy channel > Bioturbed mud; Sandy channel > River |     |              |
| Compound 114 | 10.474 | 8.40E-05 | 0.000349 | Bioturbed mud > River; Bioturbed mud > Sandy channel                        |     |              |
| Compound 204 | 10.372 | 9.12E-05 | 0.000374 | River > Bioturbed mud; River > Sandy channel                                |     |              |
| Compound 202 | 10.357 | 9.23E-05 | 0.000374 | River > Bioturbed mud; River > Sandy channel                                |     |              |
| Compound 39  | 10.189 | 0.000106 | 0.000418 | River > Bioturbed mud; Sandy channel > Bioturbed mud                        |     |              |
| Compound 89  | 10.138 | 0.00011  | 0.00043  | Sandy channel > Bioturbed mud; Sandy channel > River                        |     |              |
| Compound 161 | 10.08  | 0.000116 | 0.000438 | River > Bioturbed mud; Sandy channel > Bioturbed mud                        |     |              |
| Compound 164 | 9.9981 | 0.000123 | 0.00046  | River > Bioturbed mud; River > Sandy channel                                |     |              |
| Compound 123 | 9.6182 | 0.000168 | 0.00062  | River > Bioturbed mud; Sandy channel > Bioturbed mud                        |     |              |
| Compound 137 | 9.5756 | 0.000174 | 0.000635 | River > Bioturbed mud; River > Sandy channel                                |     |              |
| Compound 206 | 9.2003 | 0.000237 | 0.000855 | River > Bioturbed mud; River > Sandy channel                                |     |              |
| Compound 47  | 9.0181 | 0.000276 | 0.000972 | River > Bioturbed mud; Sandy channel > Bioturbed mud                        |     |              |
| Compound 40  | 8.9567 | 0.00029  | 0.001001 | Bioturbed mud > River; Bioturbed mud > Sandy channel                        |     |              |
| Compound 80  | 8.8773 | 0.00031  | 0.001047 | River > Bioturbed mud; Sandy channel > Bioturbed mud                        |     |              |
| Compound 23  | 8.877  | 0.00031  | 0.001047 | Sandy channel > Bioturbed mud; Sandy channel > River                        |     |              |
| Compound 100 | 8.8416 | 0.000319 | 0.001067 | River > Bioturbed mud; Sandy channel > Bioturbed mud                        |     |              |
| Compound 256 | 8.717  | 0.000354 | 0.001158 | Sandy channel > Bioturbed mud; Sandy channel > River                        |     |              |
| Compound 227 | 8.7065 | 0.000357 | 0.001158 | River > Bioturbed mud; Sandy channel > Bioturbed mud                        |     |              |
| Compound 11  | 8.6814 | 0.000365 | 0.001171 | River > Bioturbed mud; River > Sandy channel                                |     |              |
| Compound 141 | 8.6584 | 0.000372 | 0.001182 | Bioturbed mud > Sandy channel; River > Sandy channel                        |     |              |
| Compound 128 | 8.6021 | 0.00039  | 0.001227 | Bioturbed mud > River; Bioturbed mud > Sandy channel                        |     |              |
| Compound 81  | 8.5368 | 0.000412 | 0.001283 | River > Bioturbed mud; River > Sandy channel                                |     |              |
| Compound 72  | 8.4833 | 0.000431 | 0.001317 | River > Bioturbed mud; Sandy channel > Bioturbed mud                        |     |              |
| Compound 257 | 8.3711 | 0.000473 | 0.001433 | Bioturbed mud > River; Sandy channel > River                                |     |              |
| Compound 10  | 8.3554 | 0.000479 | 0.001438 | River > Bioturbed mud; River > Sandy channel                                |     |              |
| Compound 232 | 8.2108 | 0.000541 | 0.001609 | Sandy channel > Bioturbed mud; Sandy channel > River                        |     |              |
| Compound 233 | 8.1704 | 0.00056  | 0.001635 | Bioturbed mud > River; Sandy channel > River                                |     |              |
| Compound 254 | 8.0185 | 0.000637 | 0.001842 | River > Bioturbed mud; Sandy channel > Bioturbed mud                        |     |              |

**Table 6.** Unidentified significant metabolites from sampled marine habitat sediments from Moreton bay (*continued*).

| <b>Metabolite</b> | <b>F value</b> |          | <b>P value</b> | <b>FDR</b>                                           | <b>Fisher's LSD</b> |
|-------------------|----------------|----------|----------------|------------------------------------------------------|---------------------|
| Compound 166      | 7.9946         | 0.00065  | 0.001863       | River > Bioturbed mud; River > Sandy channel         |                     |
| Compound 279      | 7.9348         | 0.000683 | 0.001909       | Sandy channel > Bioturbed mud; Sandy channel > River |                     |
| Compound 280      | 7.9348         | 0.000683 | 0.001909       | Sandy channel > Bioturbed mud; Sandy channel > River |                     |
| Compound 121      | 7.5975         | 0.00091  | 0.002498       | Sandy channel > Bioturbed mud; Sandy channel > River |                     |
| Compound 295      | 7.5583         | 0.000941 | 0.002561       | River > Bioturbed mud; Sandy channel > Bioturbed mud |                     |
| Compound 9        | 7.4635         | 0.00102  | 0.002754       | River > Bioturbed mud; River > Sandy channel         |                     |
| Compound 168      | 7.3904         | 0.001086 | 0.002883       | River > Bioturbed mud; River > Sandy channel         |                     |
| Compound 82       | 7.2349         | 0.00124  | 0.003223       | Sandy channel > Bioturbed mud                        |                     |
| Compound 122      | 7.2248         | 0.001251 | 0.003223       | Sandy channel > Bioturbed mud; Sandy channel > River |                     |
| Compound 236      | 7.1984         | 0.00128  | 0.003259       | River > Bioturbed mud; Sandy channel > Bioturbed mud |                     |
| Compound 70       | 7.167          | 0.001315 | 0.003301       | Sandy channel > Bioturbed mud                        |                     |
| Compound 209      | 7.1361         | 0.00135  | 0.00334        | Sandy channel > Bioturbed mud; Sandy channel > River |                     |
| Compound 211      | 7.1356         | 0.00135  | 0.00334        | Sandy channel > Bioturbed mud; Sandy channel > River |                     |
| Compound 208      | 7.1205         | 0.001368 | 0.003358       | Sandy channel > Bioturbed mud; Sandy channel > River |                     |
| Compound 78       | 7.095          | 0.001398 | 0.003406       | Bioturbed mud > River; Bioturbed mud > Sandy channel |                     |
| Compound 19       | 6.8789         | 0.001684 | 0.004043       | River > Bioturbed mud; River > Sandy channel         |                     |
| Compound 92       | 6.7454         | 0.001891 | 0.004439       | River > Bioturbed mud; Sandy channel > Bioturbed mud |                     |
| Compound 265      | 6.6265         | 0.002096 | 0.004885       | River > Bioturbed mud; River > Sandy channel         |                     |
| Compound 165      | 6.6063         | 0.002133 | 0.004936       | River > Bioturbed mud; River > Sandy channel         |                     |
| Compound 224      | 6.5208         | 0.002297 | 0.005242       | Sandy channel > Bioturbed mud; Sandy channel > River |                     |
| Compound 33       | 6.4699         | 0.002402 | 0.005441       | River > Bioturbed mud                                |                     |
| Compound 101      | 6.4576         | 0.002427 | 0.005461       | Sandy channel > Bioturbed mud; Sandy channel > River |                     |
| Compound 98       | 6.4243         | 0.002499 | 0.005583       | River > Bioturbed mud; Sandy channel > Bioturbed mud |                     |
| Compound 59       | 6.41           | 0.00253  | 0.005615       | Sandy channel > Bioturbed mud; Sandy channel > River |                     |
| Compound 223      | 6.3529         | 0.002659 | 0.005861       | Bioturbed mud > River                                |                     |
| Compound 95       | 6.3336         | 0.002705 | 0.005921       | River > Bioturbed mud; Sandy channel > Bioturbed mud |                     |
| Compound 237      | 6.3206         | 0.002735 | 0.005948       | River > Bioturbed mud                                |                     |
| Compound 243      | 6.2171         | 0.002994 | 0.006468       | Bioturbed mud > River                                |                     |

**Table 6.** Unidentified significant metabolites from sampled marine habitat sediments from Moreton bay (*continued*).

| Metabolite   | F value | P value  | FDR      | Fisher's LSD                                         |
|--------------|---------|----------|----------|------------------------------------------------------|
| Compound 96  | 6.1612  | 0.003144 | 0.006702 | River > Bioturbed mud; Sandy channel > Bioturbed mud |
| Compound 56  | 5.8076  | 0.004291 | 0.008908 | Bioturbed mud > Sandy channel                        |
| Compound 278 | 5.8026  | 0.00431  | 0.008908 | River > Bioturbed mud; Sandy channel > Bioturbed mud |
| Compound 301 | 5.8007  | 0.004317 | 0.008908 | River > Bioturbed mud; Sandy channel > Bioturbed mud |
| Compound 58  | 5.7936  | 0.004344 | 0.008908 | Bioturbed mud > Sandy channel; River > Sandy channel |
| Compound 272 | 5.6796  | 0.004804 | 0.00979  | River > Bioturbed mud                                |
| Compound 53  | 5.6405  | 0.004974 | 0.009947 | Bioturbed mud > Sandy channel                        |
| Compound 107 | 5.5777  | 0.005258 | 0.010387 | River > Bioturbed mud                                |
| Compound 94  | 5.5561  | 0.00536  | 0.010524 | River > Bioturbed mud; Sandy channel > Bioturbed mud |
| Compound 104 | 5.5324  | 0.005473 | 0.010619 | Sandy channel > Bioturbed mud                        |
| Compound 238 | 5.4678  | 0.005796 | 0.011047 | River > Bioturbed mud                                |
| Compound 108 | 5.3842  | 0.006244 | 0.01183  | Sandy channel > Bioturbed mud                        |
| Compound 5   | 5.3294  | 0.006556 | 0.012349 | Sandy channel > Bioturbed mud; Sandy channel > River |
| Compound 86  | 5.2928  | 0.006773 | 0.012468 | Sandy channel > Bioturbed mud; Sandy channel > River |
| Compound 87  | 5.2928  | 0.006773 | 0.012468 | Sandy channel > Bioturbed mud; Sandy channel > River |
| Compound 245 | 5.2866  | 0.006811 | 0.012468 | Sandy channel > Bioturbed mud                        |
| Compound 93  | 5.276   | 0.006876 | 0.012515 | River > Bioturbed mud; Sandy channel > Bioturbed mud |
| Compound 120 | 5.2605  | 0.006972 | 0.012619 | Sandy channel > Bioturbed mud                        |
| Compound 45  | 5.188   | 0.007438 | 0.013388 | River > Bioturbed mud; River > Sandy channel         |
| Compound 140 | 5.1279  | 0.007848 | 0.014049 | River > Bioturbed mud; River > Sandy channel         |
| Compound 244 | 5.1126  | 0.007956 | 0.014164 | Sandy channel > Bioturbed mud                        |
| Compound 250 | 5.0157  | 0.008677 | 0.015326 | Sandy channel > Bioturbed mud; Sandy channel > River |
| Compound 152 | 5.0123  | 0.008704 | 0.015326 | Bioturbed mud > Sandy channel                        |
| Compound 156 | 4.9996  | 0.008804 | 0.015418 | Sandy channel > Bioturbed mud; Sandy channel > River |
| Compound 119 | 4.8452  | 0.010114 | 0.017523 | Bioturbed mud > Sandy channel; River > Sandy channel |
| Compound 291 | 4.6117  | 0.012485 | 0.021516 | River > Bioturbed mud                                |
| Compound 269 | 4.5736  | 0.012922 | 0.022153 | River > Bioturbed mud                                |
| Compound 285 | 4.5125  | 0.013658 | 0.02329  | River > Bioturbed mud                                |

20

**Table 6.** Unidentified significant metabolites from sampled marine habitat sediments from Moreton bay (*continued*).

| Metabolite   | F value | P value  | FDR      | Fisher's LSD                                         |
|--------------|---------|----------|----------|------------------------------------------------------|
| Compound 282 | 4.501   | 0.013801 | 0.023411 | Bioturbed mud > River                                |
| Compound 63  | 4.4284  | 0.014739 | 0.024784 | River > Sandy channel                                |
| Compound 229 | 4.4266  | 0.014763 | 0.024784 | Bioturbed mud > River; Sandy channel > River         |
| Compound 116 | 4.4189  | 0.014868 | 0.02483  | River > Bioturbed mud; Sandy channel > Bioturbed mud |
| Compound 112 | 4.4052  | 0.015054 | 0.025012 | Bioturbed mud > River; Bioturbed mud > Sandy channel |
| Compound 126 | 4.2156  | 0.017888 | 0.029271 | Bioturbed mud > Sandy channel                        |
| Compound 4   | 4.0693  | 0.020443 | 0.032965 | River > Bioturbed mud                                |
| Compound 74  | 4.069   | 0.020451 | 0.032965 | Bioturbed mud > River                                |
| Compound 34  | 4.0462  | 0.02088  | 0.033325 | River > Bioturbed mud                                |
| Compound 117 | 3.9266  | 0.023299 | 0.037004 | Bioturbed mud > Sandy channel                        |
| Compound 49  | 3.9126  | 0.0236   | 0.037293 | River > Bioturbed mud; Sandy channel > Bioturbed mud |
| Compound 172 | 3.9075  | 0.023711 | 0.037293 | Sandy channel > Bioturbed mud; Sandy channel > River |
| Compound 35  | 3.8188  | 0.025722 | 0.040066 | River > Bioturbed mud                                |
| Compound 230 | 3.7975  | 0.026231 | 0.040601 | Sandy channel > Bioturbed mud; Sandy channel > River |
| Compound 268 | 3.7917  | 0.026371 | 0.040601 | River > Bioturbed mud                                |
| Compound 235 | 3.7515  | 0.027367 | 0.041628 | River > Bioturbed mud; Sandy channel > Bioturbed mud |
| Compound 2   | 3.7451  | 0.027528 | 0.041678 | Sandy channel > Bioturbed mud; Sandy channel > River |
| Compound 113 | 3.7038  | 0.028594 | 0.04309  | Bioturbed mud > River                                |
| Compound 210 | 3.6158  | 0.031011 | 0.046331 | River > Bioturbed mud; River > Sandy channel         |
| Compound 190 | 3.5683  | 0.032402 | 0.048158 | Bioturbed mud > Sandy channel; River > Sandy channel |

The seagrass samples were excluded from the analysis as they were under-represented in the sampling of the sites.

21

22

**Table 7.** Predicted metabolic pathways based on identified metabolites from habitat sediment samples as determined by Fisher's LSD test.

| Metabolic Pathway                                       | Total | Expected | Hits | P value | Impact   |
|---------------------------------------------------------|-------|----------|------|---------|----------|
| <b>Bioturbed mud</b>                                    |       |          |      |         |          |
| Glycerolipid metabolism                                 | 14    | 0.13848  | 1    | 0.1307  | 0.13043  |
| Fructose and mannose metabolism                         | 30    | 0.29674  | 1    | 0.2611  | < 0.0001 |
| Purine metabolism                                       | 73    | 0.72206  | 1    | 0.5290  | 0.10253  |
| <b>River</b>                                            |       |          |      |         |          |
| Benzoate degradation via CoA ligation                   | 10    | 0.27695  | 2    | 0.0290  | < 0.0001 |
| D-Alanine metabolism                                    | 3     | 0.083086 | 1    | 0.0809  | < 0.0001 |
| Propanoate metabolism                                   | 20    | 0.55391  | 2    | 0.1034  | 0.05405  |
| Biosynthesis of siderophore group nonribosomal peptides | 4     | 0.11078  | 1    | 0.1064  | < 0.0001 |
| Biosynthesis of unsaturated fatty acids                 | 6     | 0.16617  | 1    | 0.1554  | < 0.0001 |
| Glyoxylate and dicarboxylate metabolism                 | 29    | 0.80317  | 2    | 0.1901  | 0.09464  |
| Starch and sucrose metabolism                           | 31    | 0.85856  | 2    | 0.2106  | 0.0954   |
| Tyrosine metabolism                                     | 10    | 0.27695  | 1    | 0.2458  | < 0.0001 |
| Glycerolipid metabolism                                 | 14    | 0.38773  | 1    | 0.3269  | 0.21739  |
| beta-Alanine metabolism                                 | 16    | 0.44313  | 1    | 0.3642  | 0.69231  |
| Alanine, aspartate and glutamate metabolism             | 18    | 0.49852  | 1    | 0.3995  | < 0.0001 |
| Selenoamino acid metabolism                             | 18    | 0.49852  | 1    | 0.3995  | < 0.0001 |
| Butanoate metabolism                                    | 18    | 0.49852  | 1    | 0.3995  | 0.02941  |
| Citrate cycle (TCA cycle)                               | 20    | 0.55391  | 1    | 0.4329  | 0.0372   |
| Phenylalanine metabolism                                | 23    | 0.63699  | 1    | 0.4796  | < 0.0001 |
| Pantothenate and CoA biosynthesis                       | 23    | 0.63699  | 1    | 0.4796  | 0.02417  |
| Pentose phosphate pathway                               | 26    | 0.72008  | 1    | 0.5227  | < 0.0001 |
| Pyruvate metabolism                                     | 26    | 0.72008  | 1    | 0.5227  | 0.07336  |
| Galactose metabolism                                    | 37    | 1.0247   | 1    | 0.6530  | < 0.0001 |
| Fatty acid metabolism                                   | 41    | 1.1355   | 1    | 0.6913  | < 0.0001 |
| Pyrimidine metabolism                                   | 44    | 1.2186   | 1    | 0.7173  | 0.00607  |
| Aminoacyl-tRNA biosynthesis                             | 66    | 1.8279   | 1    | 0.8529  | < 0.0001 |

**Table 7.** Predicted metabolic pathways based on identified metabolites from habitat sediment samples as determined by Fisher's LSD test (*continued*).

| Metabolic Pathway                           | Total | Expected | Hits | P value | Impact   |
|---------------------------------------------|-------|----------|------|---------|----------|
| <b>Sandy channel</b>                        |       |          |      |         |          |
| Valine, leucine and isoleucine degradation  | 23    | 0.4095   | 2    | 0.0608  | < 0.0001 |
| Pantothenate and CoA biosynthesis           | 23    | 0.4095   | 2    | 0.0608  | 0.08524  |
| Valine, leucine and isoleucine biosynthesis | 26    | 0.46291  | 2    | 0.0756  | 0.10594  |
| Tyrosine metabolism                         | 10    | 0.17804  | 1    | 0.1651  | < 0.0001 |
| Benzoate degradation via CoA ligation       | 10    | 0.17804  | 1    | 0.1651  | < 0.0001 |
| Glycerolipid metabolism                     | 14    | 0.24926  | 1    | 0.2237  | 0.21739  |
| Alanine, aspartate and glutamate metabolism | 18    | 0.32047  | 1    | 0.2783  | < 0.0001 |
| Butanoate metabolism                        | 18    | 0.32047  | 1    | 0.2783  | 0.02941  |
| Citrate cycle (TCA cycle)                   | 20    | 0.35608  | 1    | 0.3042  | 0.0372   |
| Propanoate metabolism                       | 20    | 0.35608  | 1    | 0.3042  | 0.05405  |
| Phenylalanine metabolism                    | 23    | 0.4095   | 1    | 0.3415  | < 0.0001 |
| Pentose phosphate pathway                   | 26    | 0.46291  | 1    | 0.3769  | < 0.0001 |
| Glyoxylate and dicarboxylate metabolism     | 29    | 0.51632  | 1    | 0.4105  | < 0.0001 |
| Galactose metabolism                        | 37    | 0.65875  | 1    | 0.4918  | < 0.0001 |
| Aminoacyl-tRNA biosynthesis                 | 66    | 1.1751   | 1    | 0.7065  | < 0.0001 |

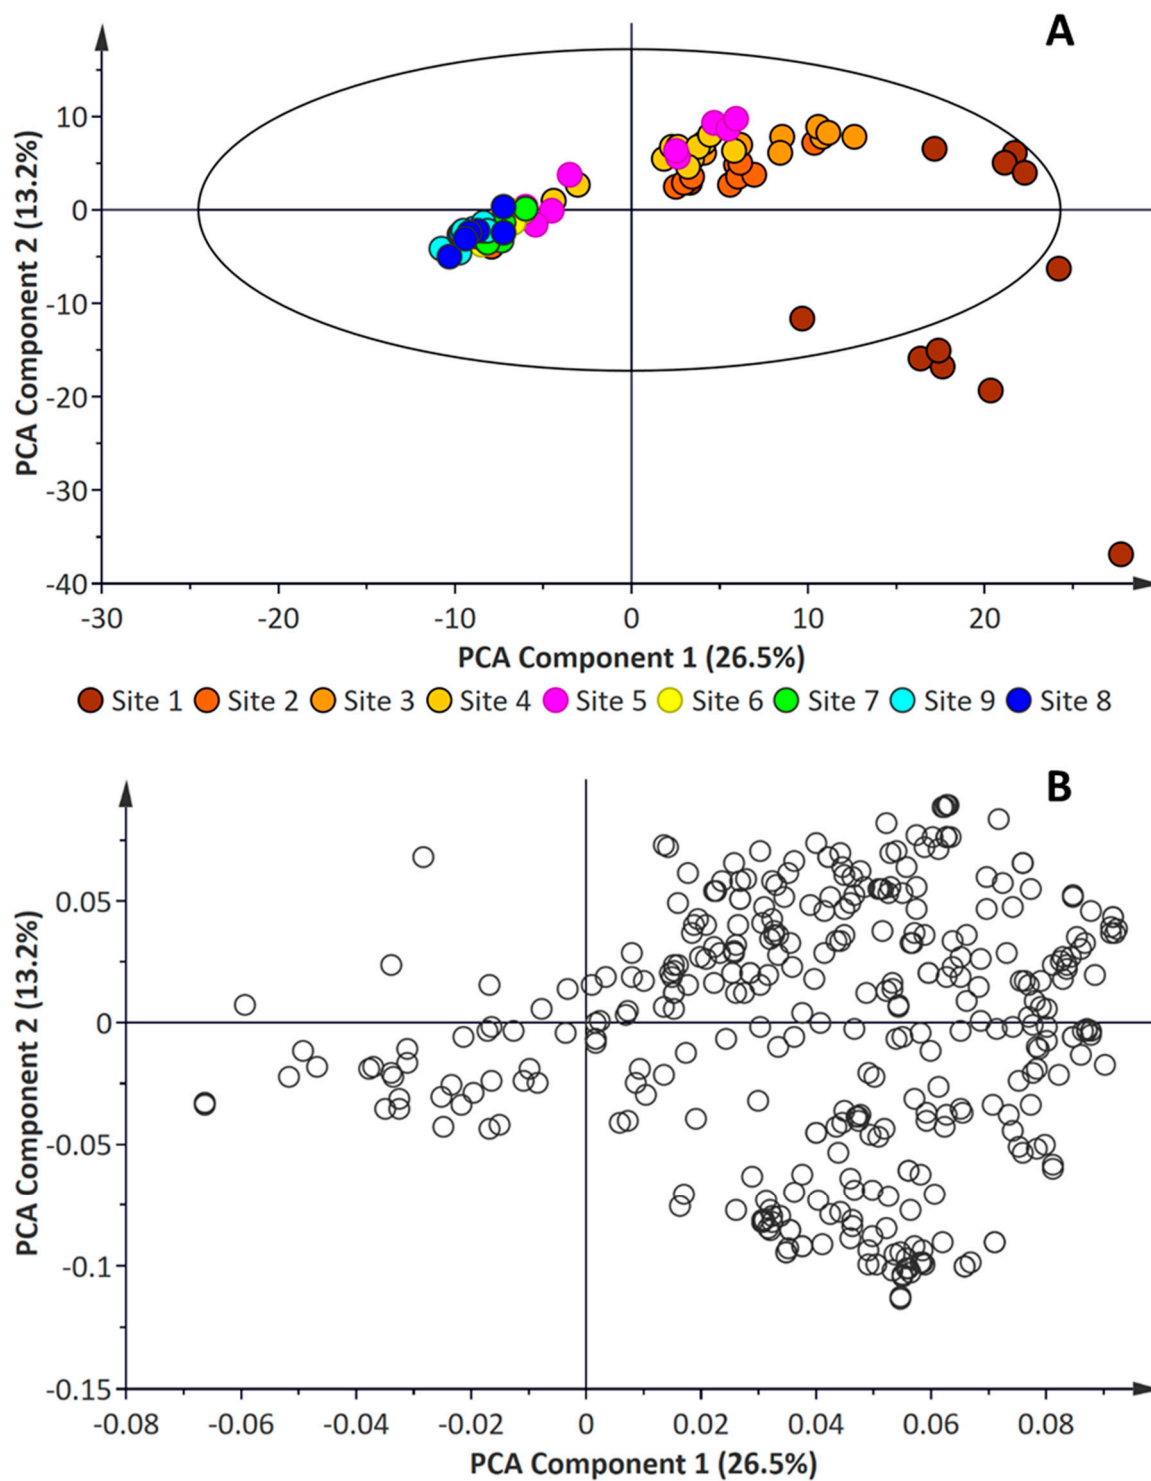

**Figure 1.** Principal Component Analysis (PCA) of Moreton Bay marine sediment site metabolomics data A. PCA Score Scatter plot, B. PCA Loading Scatter plot. Note: the PCA model linearity ( $R^2X$ ) and predictability ( $Q^2$ ) were observed at 0.814 and 0.464, respectively. This is indicative of a good fit model ( $>0.7$ ) and has a poor predictive capability ( $<0.5$ ).

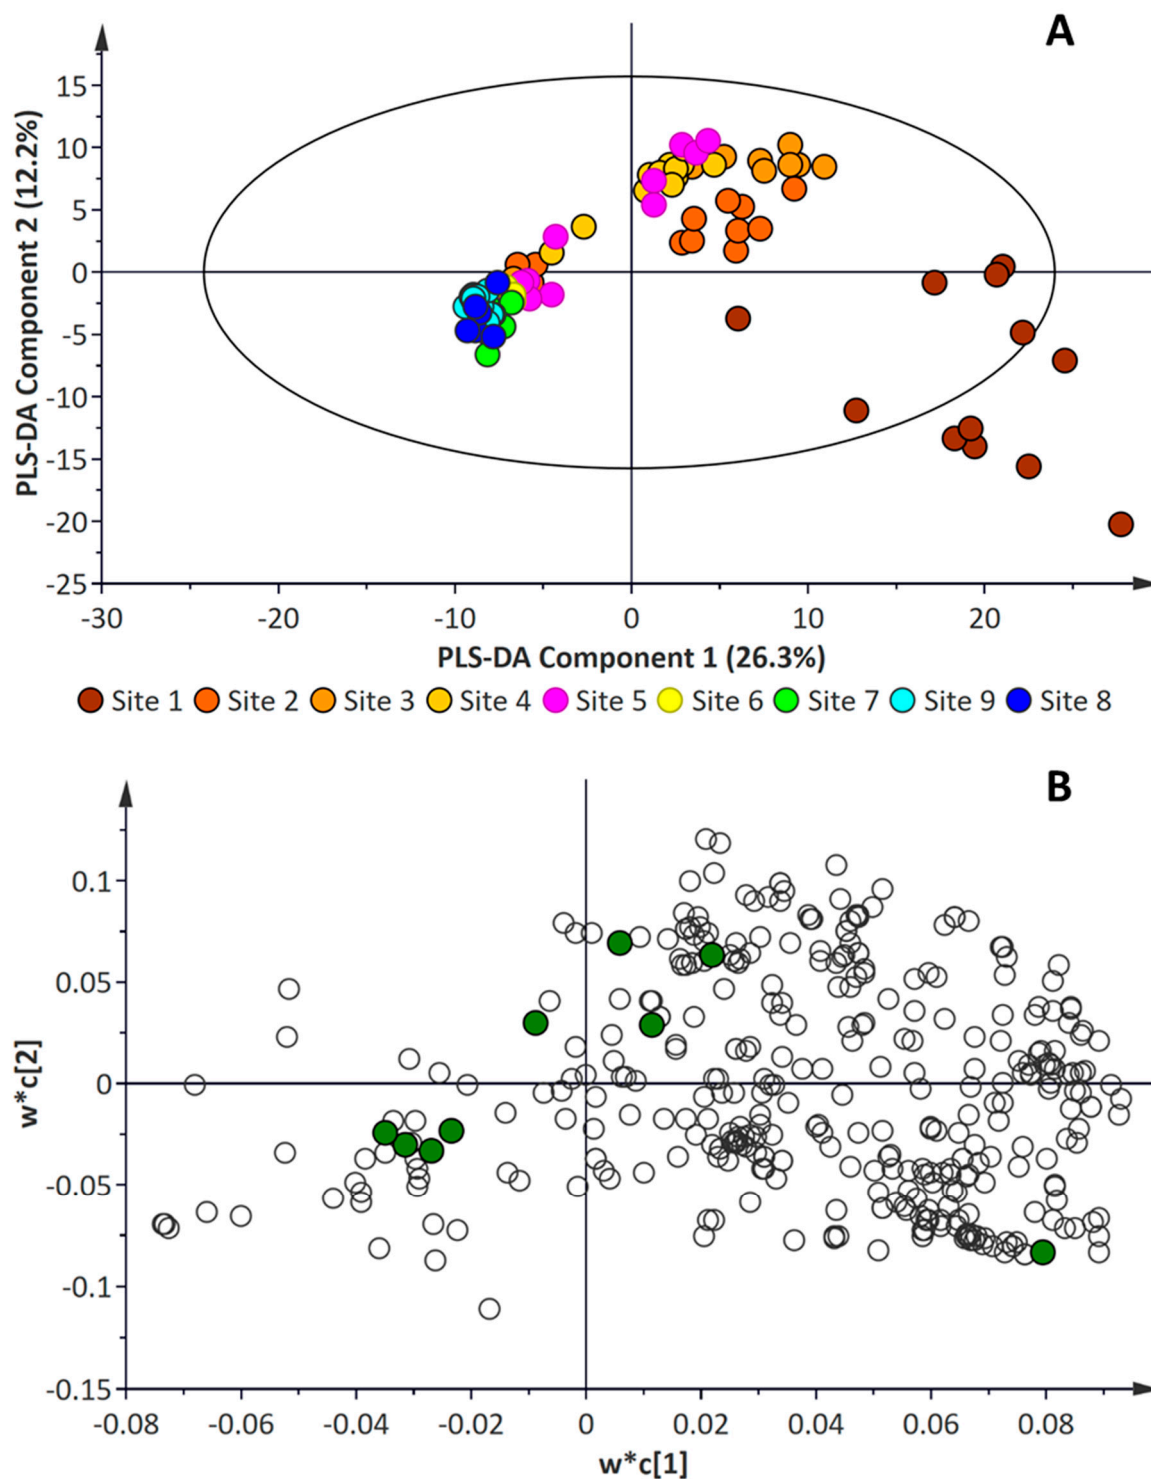

**Figure 2.** Partial Least Squares – Discriminant Analysis (PLS-DA) of Moreton Bay marine sediment site metabolomics data A. PLS-DA Score Scatter plot, B. PLS-DA Loading Scatter plot. Note: the PLS-DA model linearity ( $R^2X$  and  $R^2Y$ ) and predictability ( $Q^2$ ) were observed at 0.837, 0.904 and 0.541, respectively. This is indicative of a good fit model ( $> 0.7$ ) and has a poor predictive capability ( $\sim 0.5$ ).

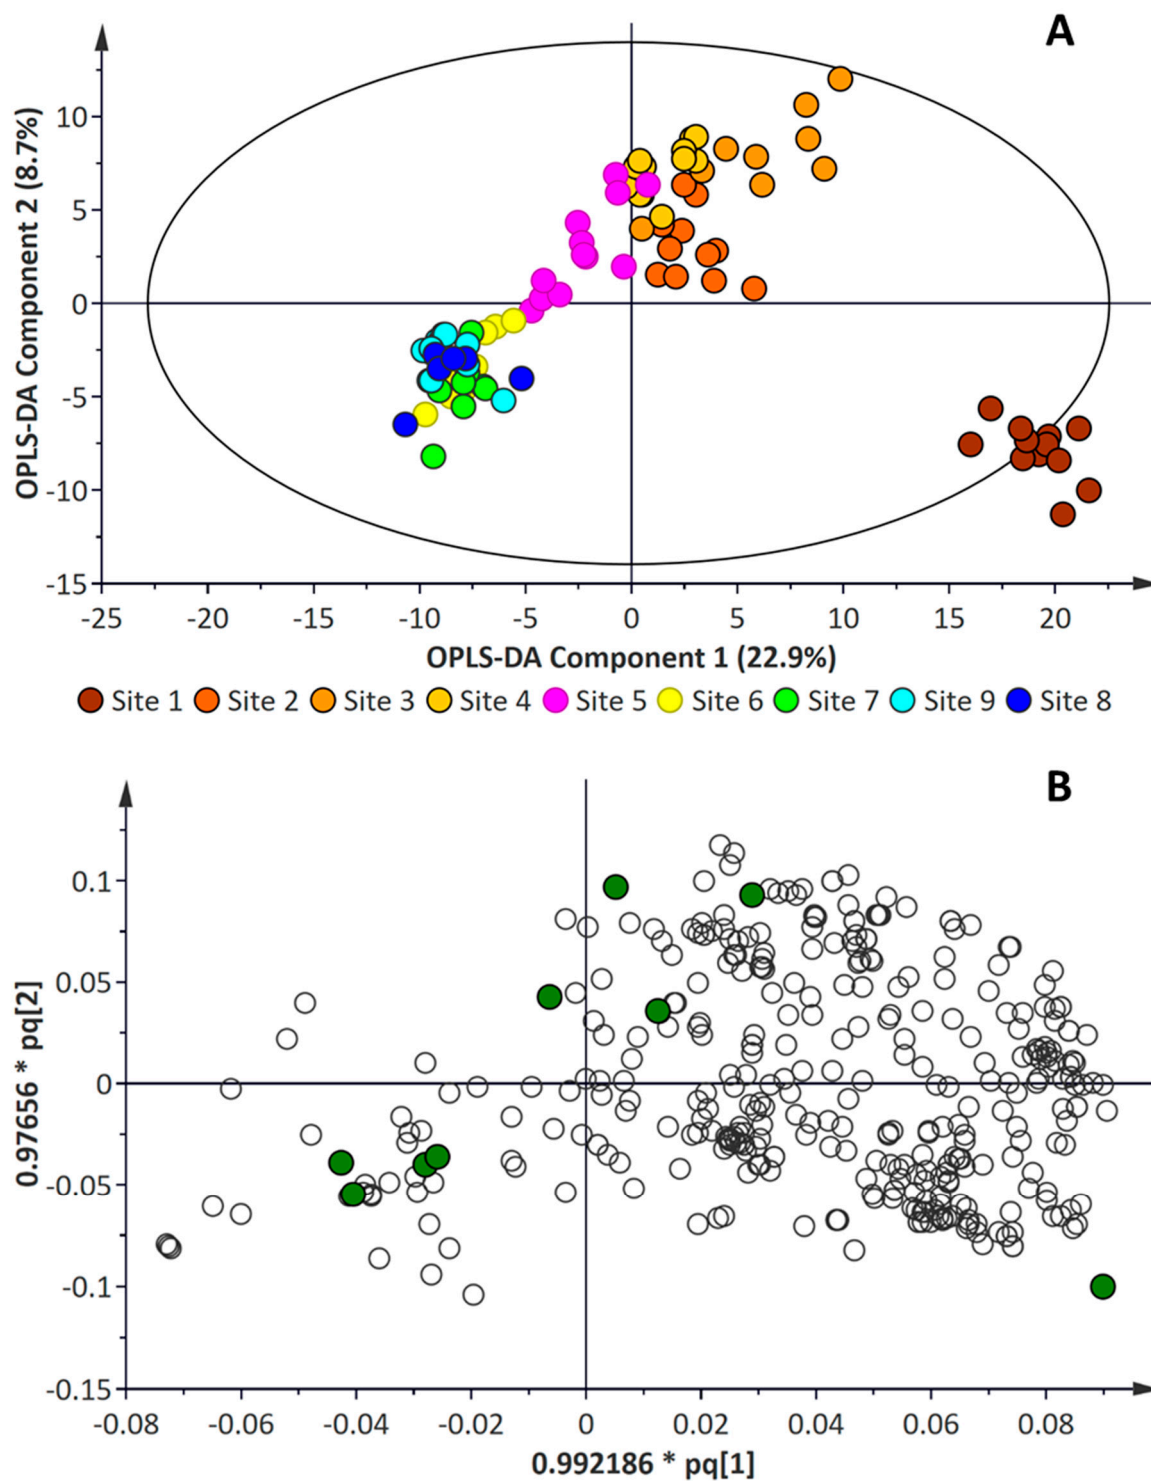

**Figure 3.** Orthogonal Partial Least Squares – Discriminant Analysis (OPLS-DA) of Moreton Bay marine sediment site metabolomics data A. OPLS-DA Score Scatter plot, B. OPLS-DA Loading Scatter plot. Note: the OPLS-DA model linearity ( $R^2X$  and  $R^2Y$ ) and predictability ( $Q^2$ ) were observed at 0.726, 0.769 and 0.562, respectively. This is indicative of a good fit model ( $> 0.7$ ) and has a poor predictive capability ( $\sim 0.5$ ).

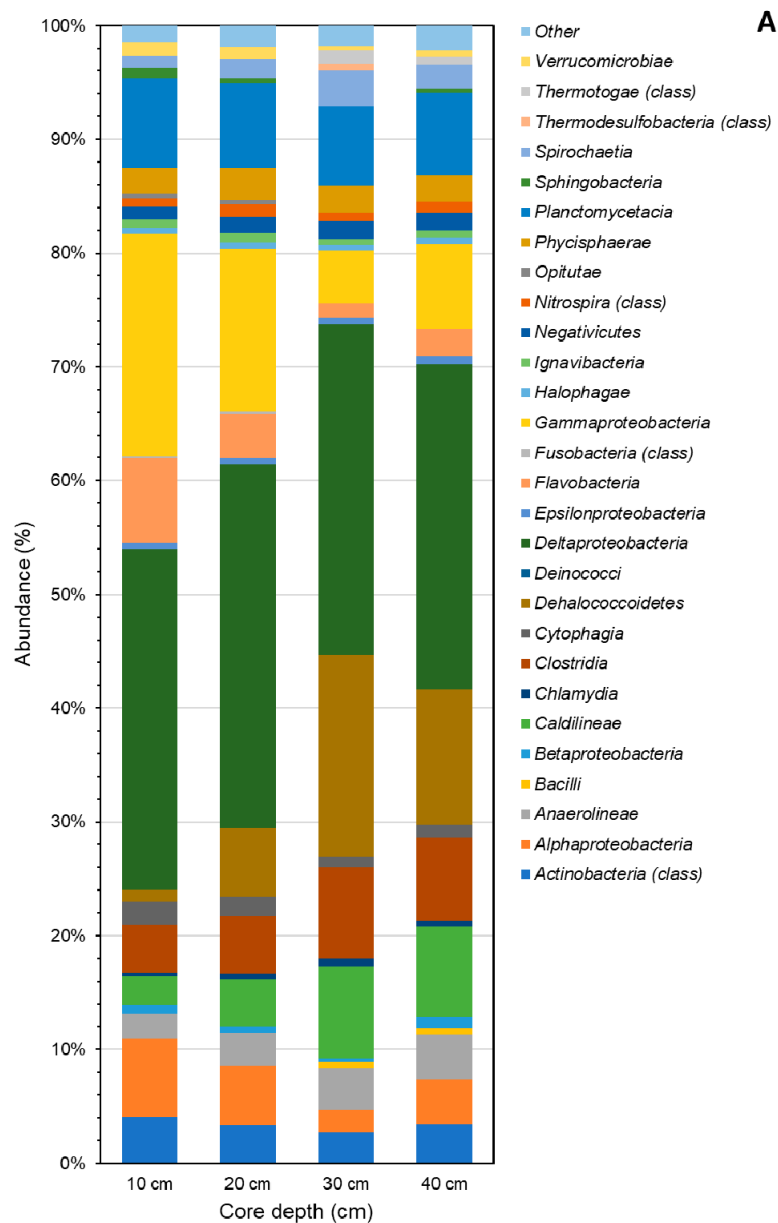

**Figure 4.** Bacterial classification among core depth sampled sites for cohort A. Class, B. Order, C. Genus.

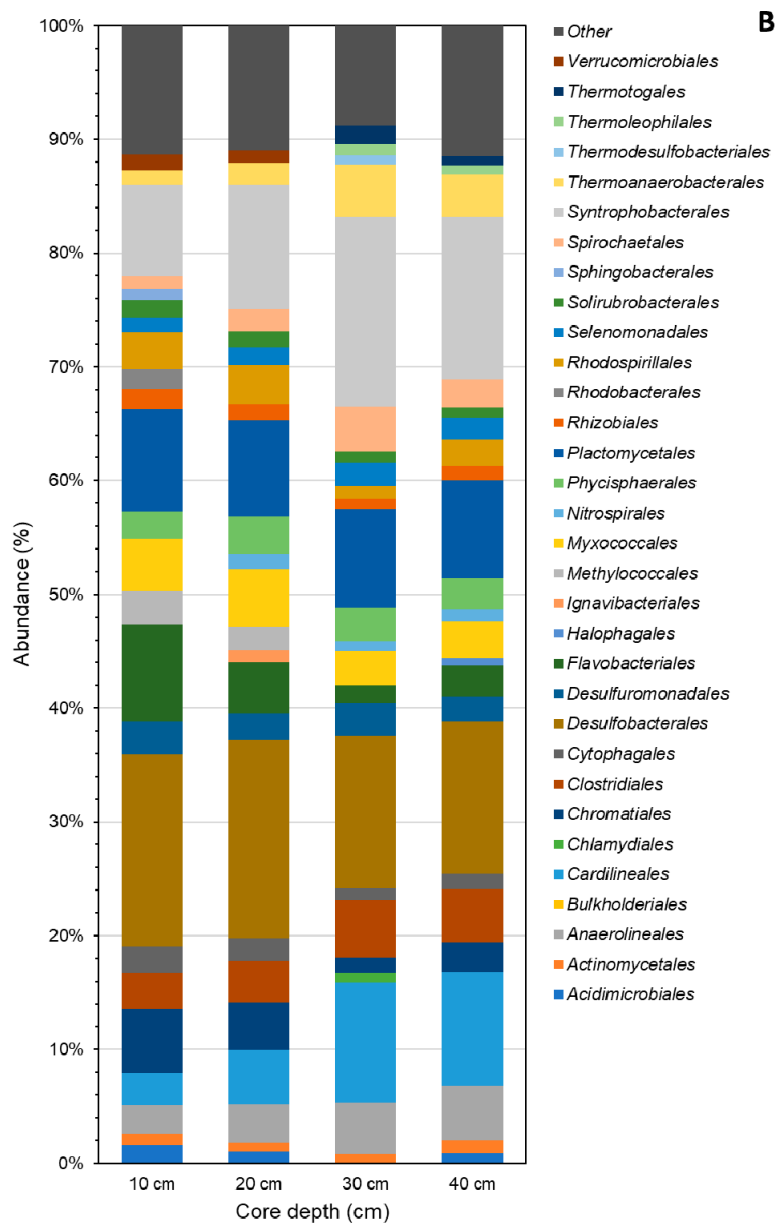

**Figure 4.** Bacterial classification among core depth sampled sites for cohort A. Class, B. Order, C. Genus (*continued*).

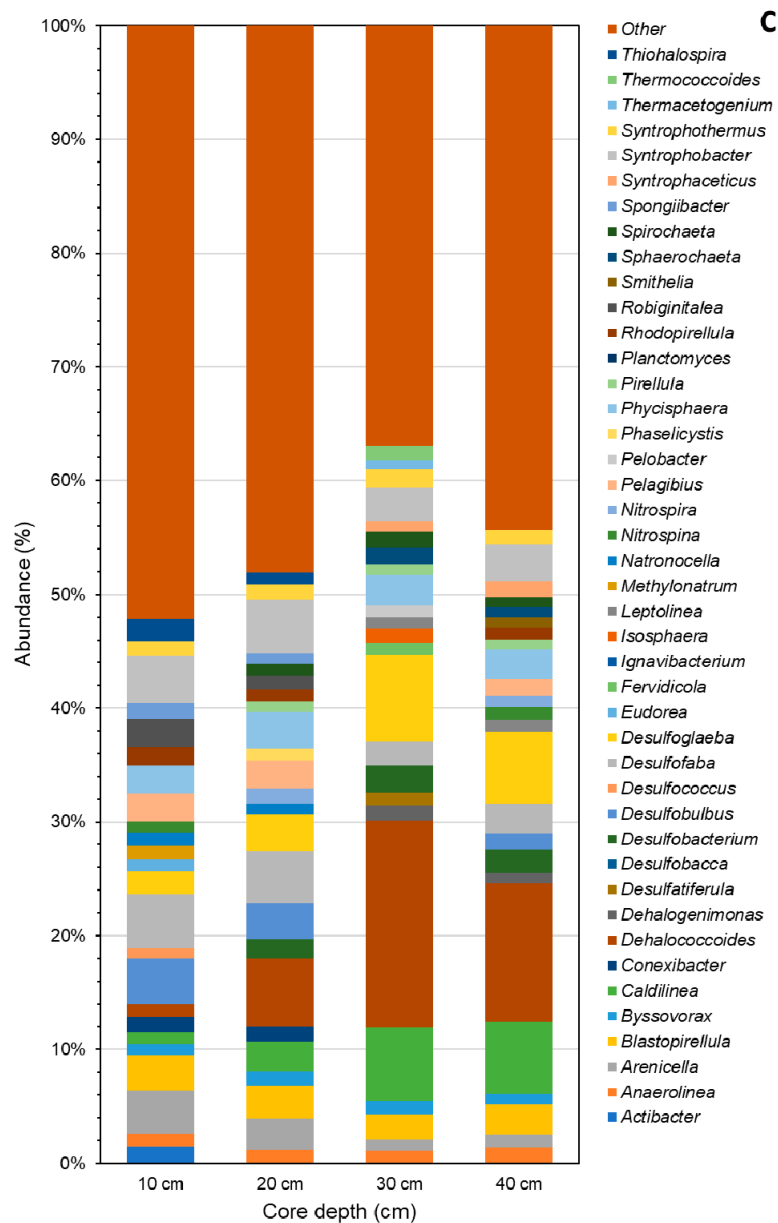

**Figure 4.** Bacterial classification among core depth sampled sites for cohort A. Class, B. Order, C. Genus (*continued*).

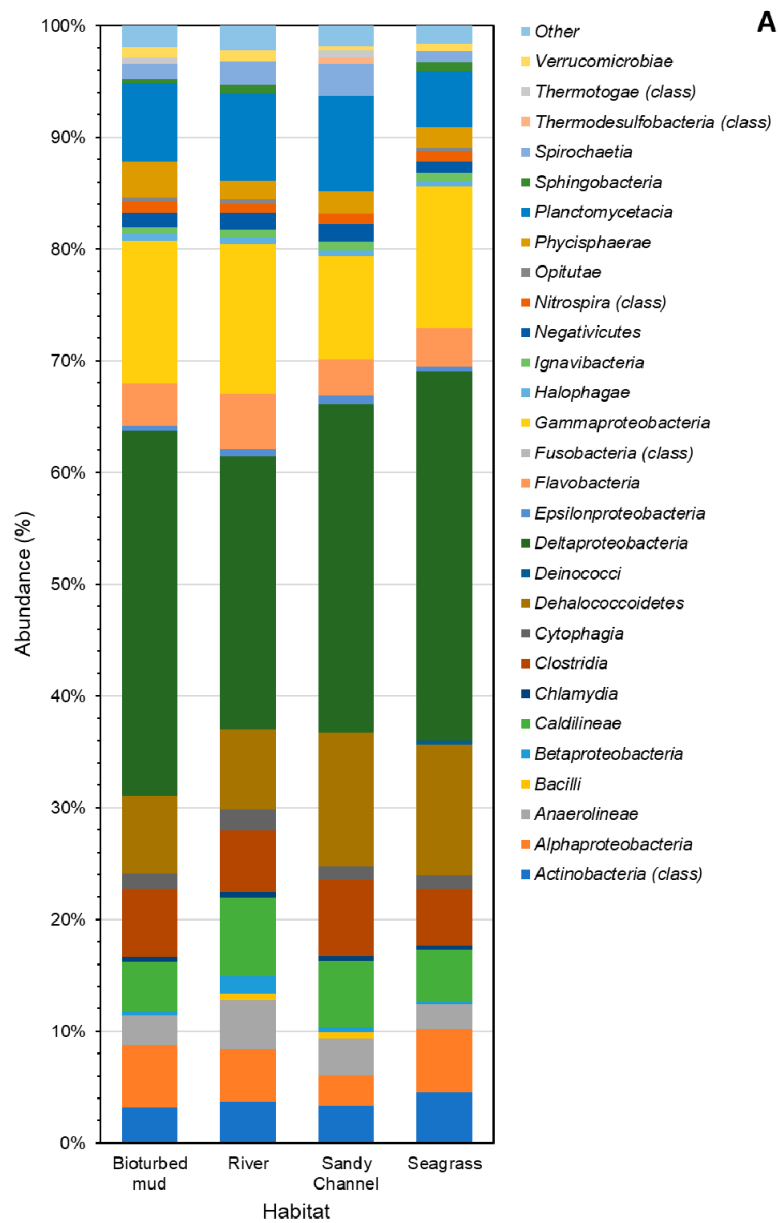

**Figure 5.** Bacterial classification among habitats sampled sites for cohort A. Class, B. Order, C. Genus (continued).

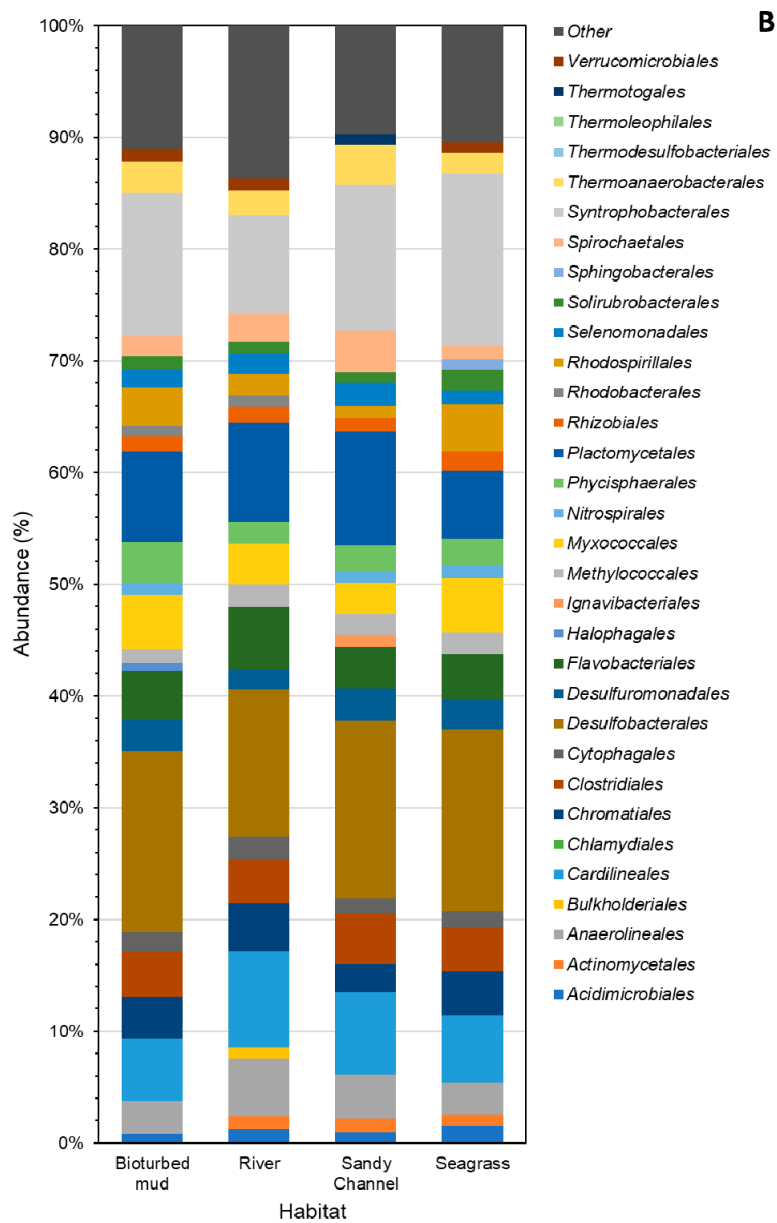

**Figure 5.** Bacterial classification among habitats sampled sites for cohort A. Class, B. Order, C. Genus  
(continued).

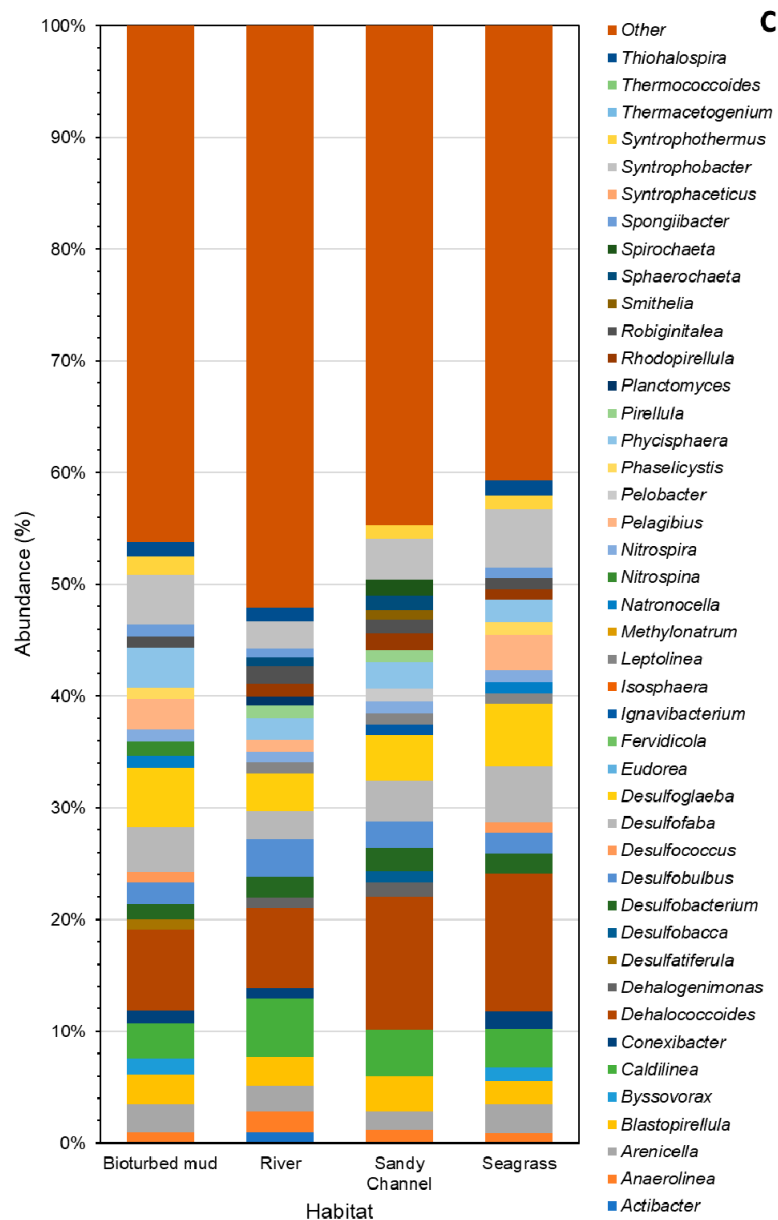

**Figure 5.** Bacterial classification among habitats sampled sites for cohort A. Class, B. Order, C. Genus (continued).
