# Supplementary material
Source: MDPI journal article supplement (https://www.mdpi.com/2076-2607/7/10/419)
Supplement: s2 [file s2]

Archive with 1 entries (1 files):
- microorganisms-581971-SI.pdf
